# Supplementary material for: Clinical features of central nervous system infections and experience in differential diagnosis from neuropsychiatric lupus erythematosus in a cohort of 8491 patients with systemic lupus erythematosus
Source: PubMed Central journal article supplement (PMC6701089; doi:10.1186/s13075-019-1971-2), 2019-08-19
Supplement: 13075_2019_1971_MOESM1_ESM.pdf [file 13075_2019_1971_MOESM1_ESM.pdf]

**Supplementary file 1.** Flowchart of screening of SLE patients with CNS infections and NPSLE

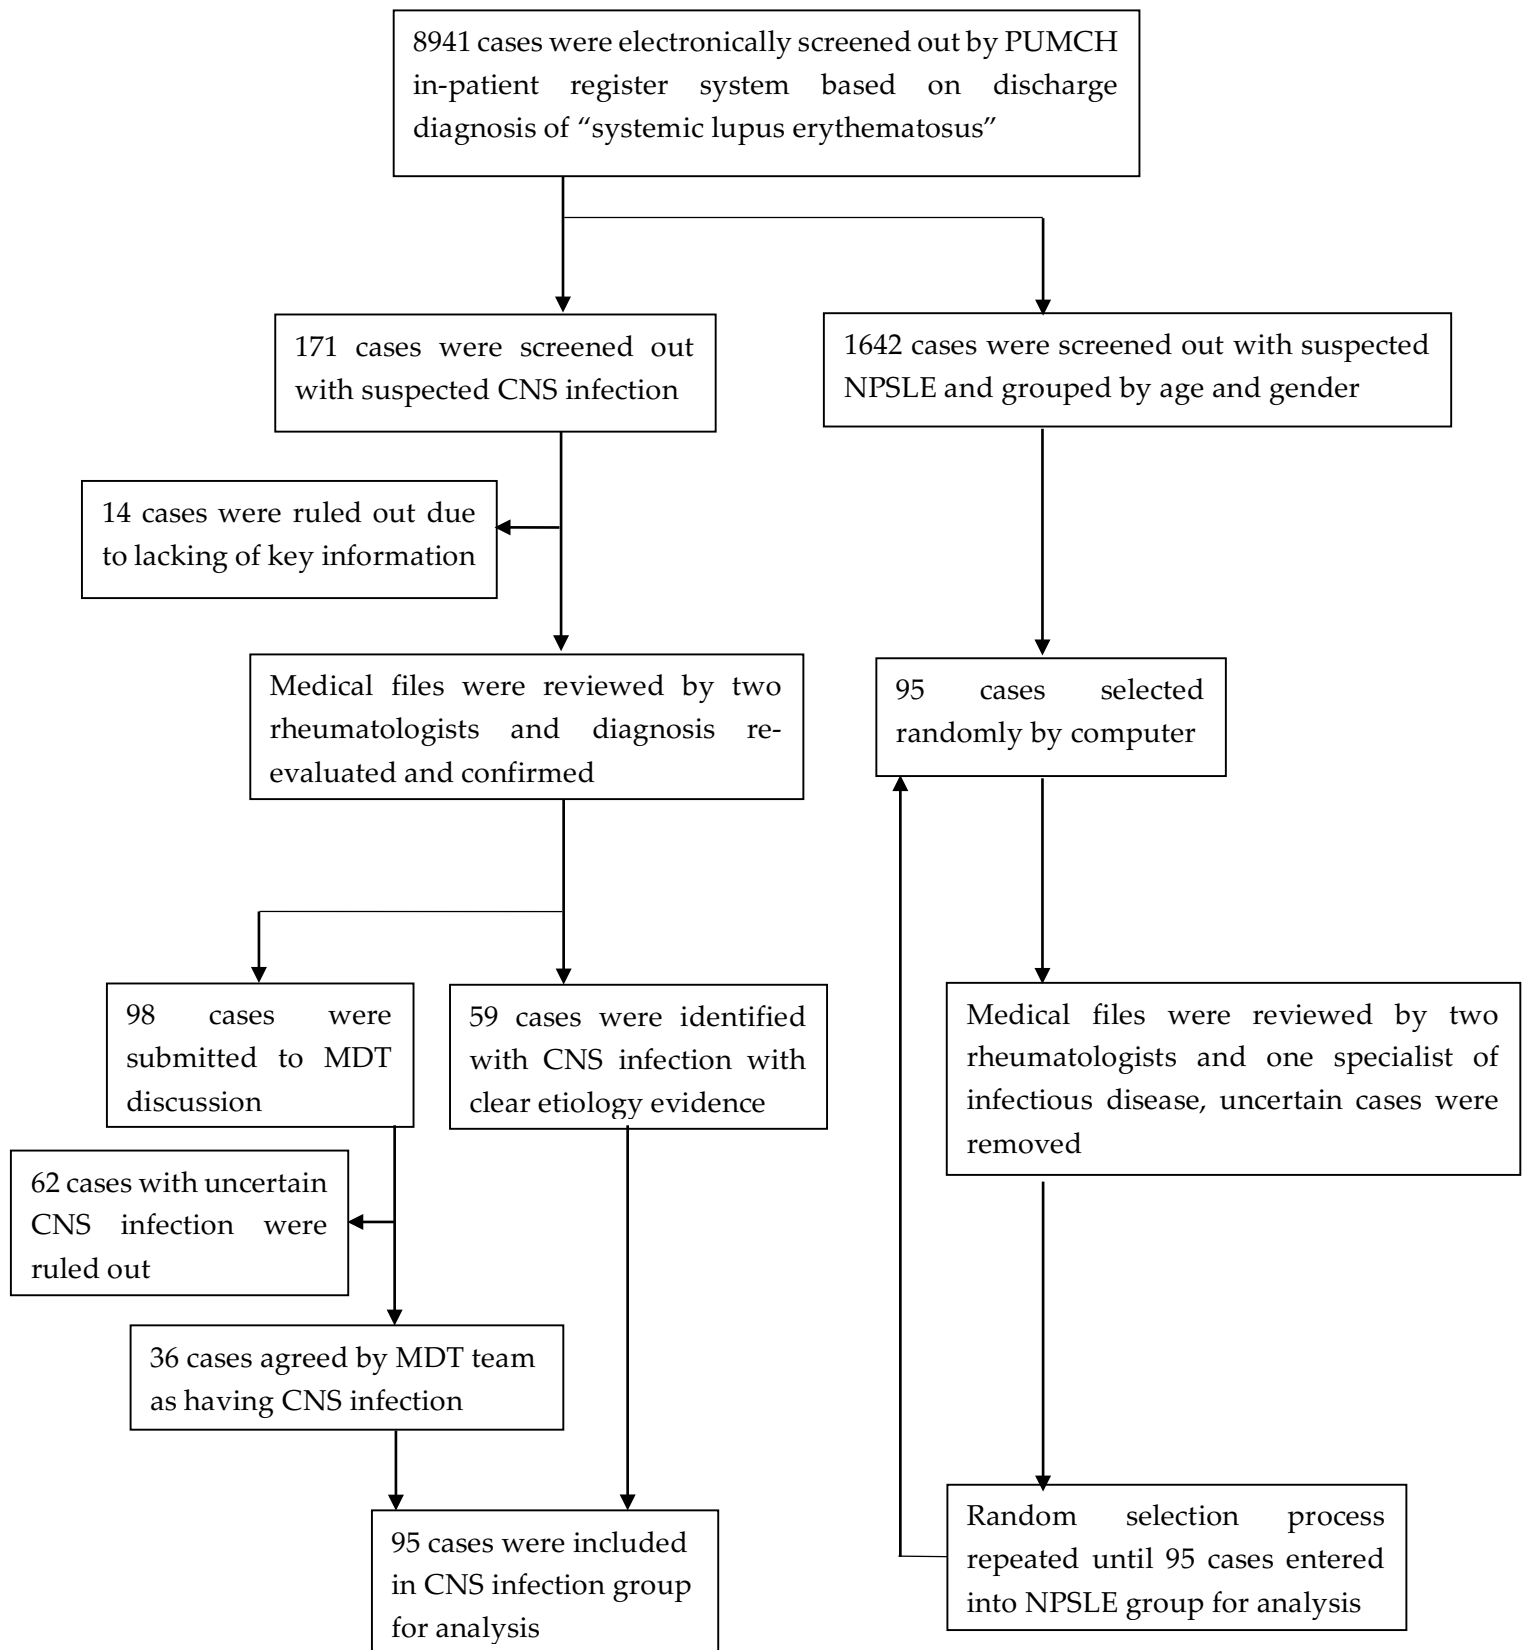

PUMCH: Peking Union Medical College Hospital; CNS: central nervous system; NPSLE: neuropsychiatric lupus erythematosus; MDT: multiple disciplinary team
