# Supplementary material for: Clinical features of central nervous system infections and experience in differential diagnosis from neuropsychiatric lupus erythematosus in a cohort of 8491 patients with systemic lupus erythematosus
Source: PubMed Central journal article supplement (PMC6701089; doi:10.1186/s13075-019-1971-2), 2019-08-19
Supplement: 13075_2019_1971_MOESM2_ESM.pdf [file 13075_2019_1971_MOESM2_ESM.pdf]

**Supplementary file 2.** The prevalence rate of CNS infections with SLE vs. NPSLE

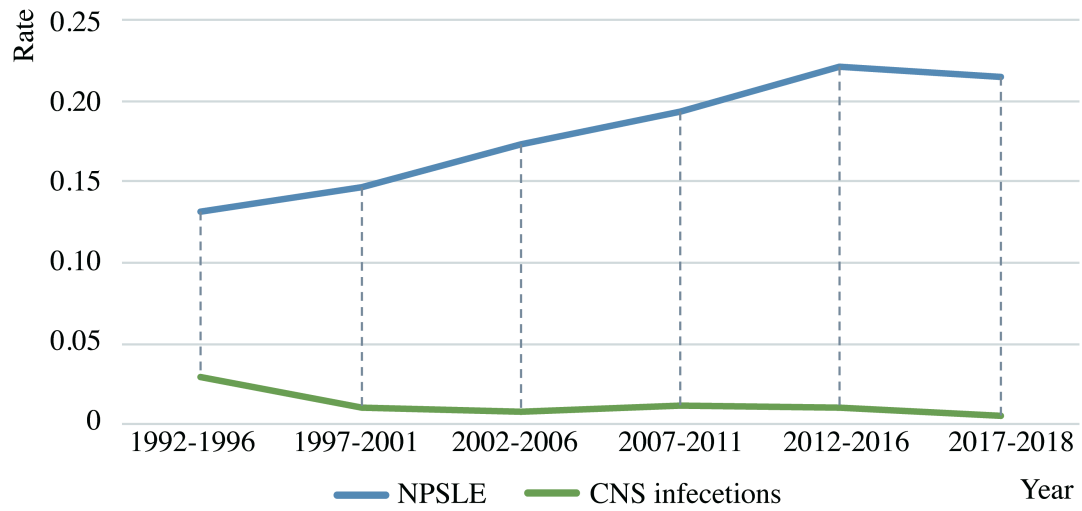

SLE: systemic lupus erythematosus; CNS: central nervous system; NPSLE: neuropsychiatric lupus erythematosus;
