# Supplementary material for: Clinical features of central nervous system infections and experience in differential diagnosis from neuropsychiatric lupus erythematosus in a cohort of 8491 patients with systemic lupus erythematosus
Source: PubMed Central journal article supplement (PMC6701089; doi:10.1186/s13075-019-1971-2), 2019-08-19
Supplement: 13075_2019_1971_MOESM3_ESM.pdf [file 13075_2019_1971_MOESM3_ESM.pdf]

**Supplementary file 3.** The change of etiology of 59 SLE patients with CNS infections with a 5-year interval frame

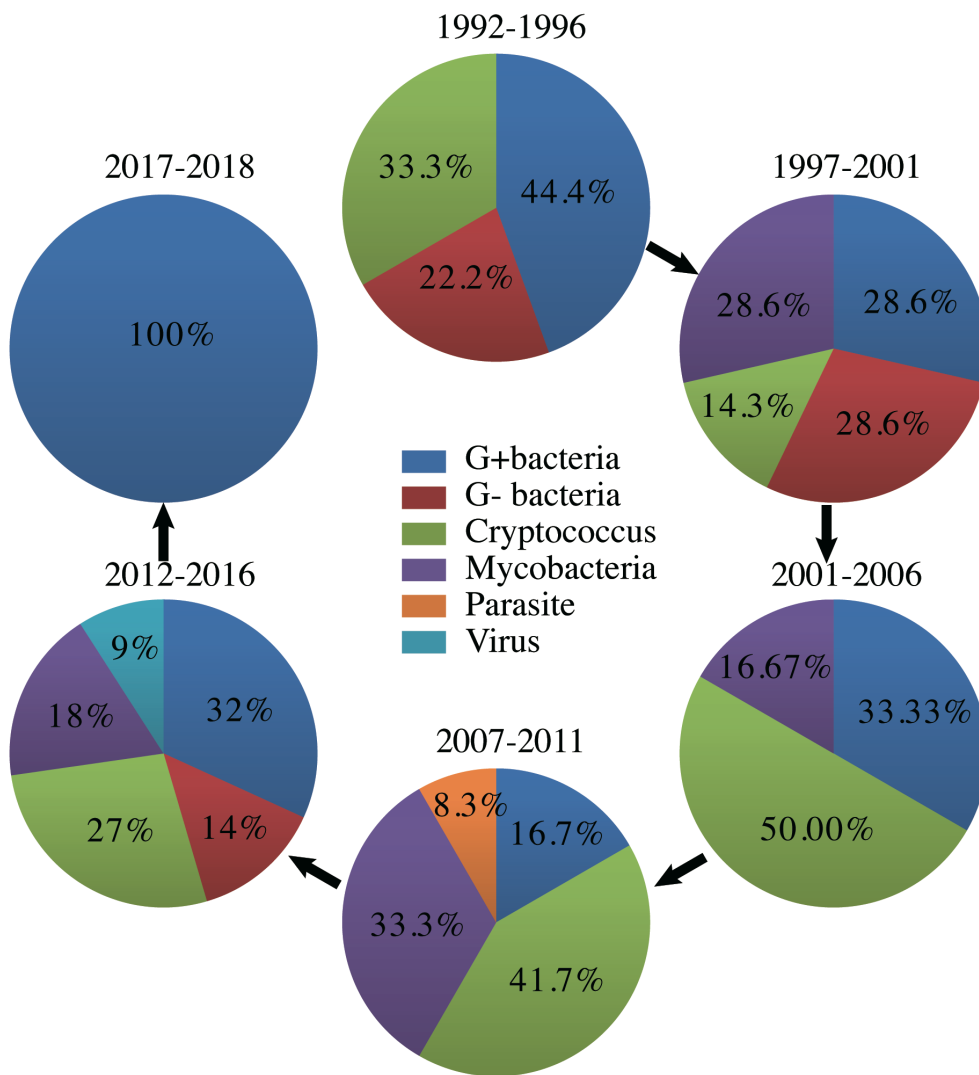

G+ bacteria: gram-staining positive bacteria; G- bacteria: gram-staining negative bacteria;
