# Supplementary material for: Clinical features of central nervous system infections and experience in differential diagnosis from neuropsychiatric lupus erythematosus in a cohort of 8491 patients with systemic lupus erythematosus
Source: PubMed Central journal article supplement (PMC6701089; doi:10.1186/s13075-019-1971-2), 2019-08-19
Supplement: 13075_2019_1971_MOESM4_ESM.pdf [file 13075_2019_1971_MOESM4_ESM.pdf]

**Supplementary file 4.** CNS infections in SLE patients with different etiology findings

|                                                                         | Bacterium<br>(n=27) | Cryptococcus<br>(n=18) | Mycobacterium<br>(n=11) | P value         |
|-------------------------------------------------------------------------|---------------------|------------------------|-------------------------|-----------------|
| Interval from CNS onset to CNS infections diagnosis, days, median (IQR) | 4 (2-14)            | 22 (6-51)              | 24 (7-55)               | <b>&lt;0.01</b> |
| SLEDAI-2K $\geq$ 10 at infections, n (%)                                | 13 (48.1)           | 3 (16.7)               | 1 (9.1)                 | <b>&lt;0.05</b> |
| Treatment, n (%)                                                        |                     |                        |                         |                 |
| Pulse GCs                                                               | 7 (25.9)            | 9 (50.0)               | 4 (36.4)                | 0.256           |
| CTX/MMF in past 1 year                                                  | 13 (48.1)           | 11(61.1)               | 8(72.7)                 | 0.350           |
| CNS manifestation, n (%)                                                |                     |                        |                         |                 |
| Consciousness disturbance                                               | 16 (59.3)           | 3 (16.7)               | 6 (54.5)                | <b>&lt;0.05</b> |
| Meningeal irritation                                                    | 22 (81.5)           | 7 (38.9)               | 8 (72.7)                | <b>&lt;0.05</b> |
| CSF examination                                                         |                     |                        |                         |                 |
| Pressure $>$ 300 mmH <sub>2</sub> O, n (%)                              | 12 (44.4)           | 12 (66.7)              | 7 (63.6)                | 0.347           |
| Protein, g/L, mean (SD)                                                 | 1.65 (1.07)         | 1.50 (1.41)            | 1.73 (0.80)             | 0.859           |
| Glucose, mmol/L, mean (SD)                                              | 1.77 (1.17)         | 2.01 (1.61)            | 1.71 (1.21)             | 0.787           |
| Laboratory data                                                         |                     |                        |                         |                 |
| Peripheral WBCs, 10 <sup>6</sup> /L, mean (SD)                          | 11192 (8295)        | 7893 (4031)            | 7966 (3345)             | 0.172           |
| ESR, mm/h, mean (SD)                                                    | 62.5 (43.5)         | 52.3 (43.4)            | 40.6 (28.2)             | 0.320           |
| Mortality rate <sup>#</sup> , n (%)                                     | 10 (37.0)           | 3 (16.7)               | 3 (27.3)                | 0.221           |

SLE: systemic lupus erythematosus; CNS: central nervous system; SLEDAI-2K: systemic lupus erythematosus disease activity index 2000; GCs: glucocorticosteroids; CTX: cyclophosphamide; MMF: mycophenolate mofetil; CSF: cerebrospinal fluid; WBCs: white blood cells; ESR: erythrocyte sedimentation rate,<sup>#</sup> Evaluated at one year of the diagnosis of CNS infections or NPSLE.
